# Supplementary material
Source: PubMed Central journal article supplement (PMC5551669)
Supplement: NIHMS889624-supplement-sup.pdf [file NIHMS889624-supplement-sup.pdf]

Supplementary Table 1. Primer sequences and genotyping condition of STR markers

| STR Marker  | Genomic coordinate (hg19)   | FORWARD primer <sup>(a)</sup> | REVERSE primer <sup>(b)</sup> | Annealing Temp (C) | 5'-Dye | RefSeq size |
|-------------|-----------------------------|-------------------------------|-------------------------------|--------------------|--------|-------------|
| 21732AC23   | chr16:21,732,554-21,732,600 | TTTGTATTTTTAGTAGGGACGG        | CTTCTCTGTATTGGTTGTTTG         | 50                 | FAM    | 216         |
| 23037GT23   | chr16:23,037,671-23,037,716 | GACAGTGAGGTGGGAATCAAAG        | AAATCTCTGGGACTCTGAAACC        | 50                 | FAM    | 222         |
| D16S412     | chr16:23,162,662-23,162,712 | AATTGCTTGAACCCAGGAGA          | GTGGGCTTCAACCCAGTAGA          | 60                 | fluo   | 248         |
| 23622TCTA14 | chr16:23,622,400-23,622,456 | AGAGGAAGACTCTGTCTCAAAA        | GTAATTCTAGAGATGAATTCAACTG     | 55                 | FAM    | 132         |
| 23749TATG14 | chr16:23,749,512-23,749,567 | GGAGAACTGAAATGAGAGTGCC        | CTGGGTGATAGAGCAAGACTGTC       | 55                 | FAM    | 268         |
| D16S417     | chr16:23,777,202-23,777,238 | AACATGCAGCCTCCTTCTTC          | CTGGTTAGCCAGACCTGCTC          | 60                 | fluo   | 167         |
| D16S401     | chr16:24,686,016-24,686,059 | ACGGAGTTCCACATAAAAGCAGGCA     | TGCCTGGTGGGTGGAGAATTTGGA      | 68                 | TAMRA  | 275         |

<sup>a</sup>FORWARD primer is 5' fluorescently labeled

<sup>b</sup>REVERSE primer has a non-template 5'-pigtail (GTGTCTT) for improved genotyping

Supplemental Table 2. Allele numbers and corresponding microsatellite sizes for each STR marker

|           | Size in BP of each STR marker allele |           |         |             |             |         |         |
|-----------|--------------------------------------|-----------|---------|-------------|-------------|---------|---------|
| # alleles | 21732AC23                            | 23037GT23 | D16S412 | 23622TCTA14 | 23749TATG14 | D16S417 | D16S401 |
| 1         | 214                                  | 228       | 237     | 123         | 276         | 158     | 264     |
| 2         | 216                                  | 230       | 239     | 127         | 280         | 162     | 266     |
| 3         | 218                                  | 232       | 241     | 131         | 284         | 164     | 268     |
| 4         | 220                                  | 234       | 243     | 135         | 288         | 166     | 270     |
| 5         | 222                                  | 236       | 245     | 139         |             | 170     | 272     |
| 6         | 224                                  | 238       |         | 143         |             | 172     | 274     |
| 7         | 226                                  | 240       |         | 147         |             | 176     | 276     |
| 8         | 228                                  | 242       |         |             |             | 180     | 278     |
